# Supplementary material
Source: PubMed Central journal article supplement (PMC5641880)
Supplement: 10.1074_M117.800201_jbc.M117.800201-1.pdf [file 10.1074_M117.800201_jbc.M117.800201-1.pdf]

Supplemental Data

**The calcium-binding protein ALG-2 regulates protein secretion and trafficking via interactions with MISSL and MAP1B**

Terunao Takahara, Kuniko Inoue, Yumika Arai, Keiko Kuwata, Hideki Shibata and Masatoshi Maki

List of the materials

Figure S1

Figure S2

Figure S3

Figure S4

Supplemental movie S1

Supplemental movie S2

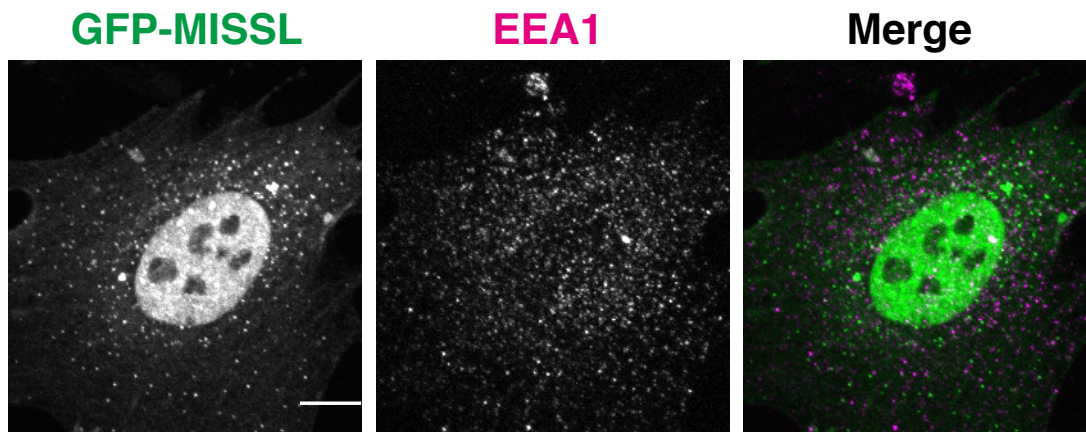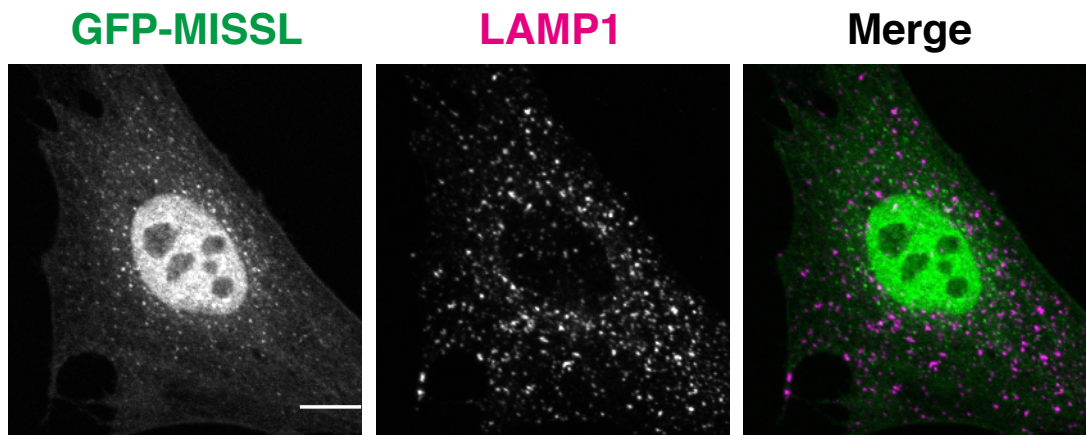

**Figure S1 GFP-MISSL rarely colocalizes with EEA1 and LAMP1**

HeLa cells transiently expressing GFP-MISSL were starved of amino acids for 50 min, and then amino acid mixture was added for 7.5 min. Cells were fixed with 4% paraformaldehyde for 15 min and permeabilized with 0.01 % digitonin for 5 min. EEA1 (an early endosome marker) and LAMP1 (a lysosome marker) were immunostained with anti-EEA1 and anti-LAMP1 antibodies, respectively, and fluorescence signals were obtained with the confocal microscopy. Merged images of GFP-MISSL (green), and EEA1 or LAMP1 (magenta) were also shown (Merge). Bars, 10  $\mu$ m.

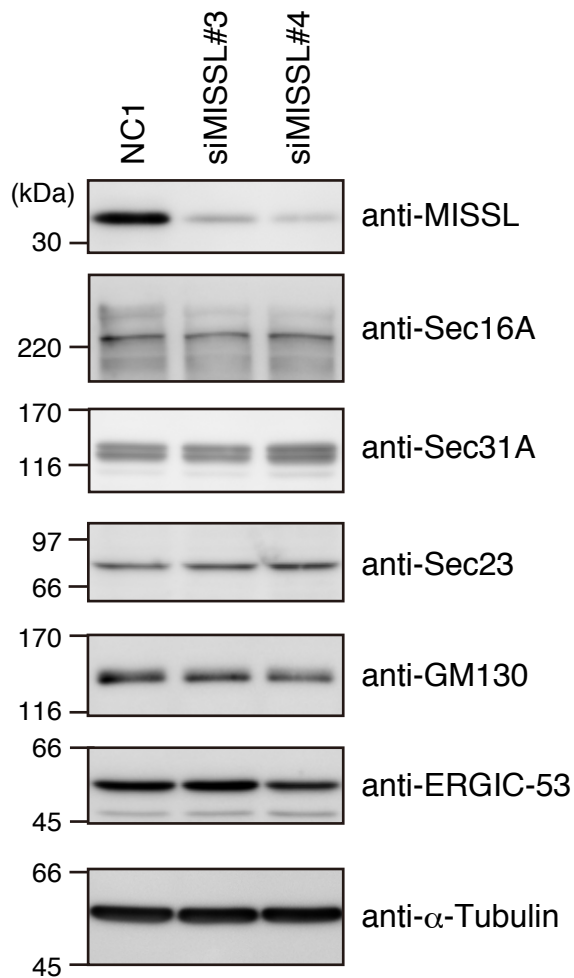

**Figure S2 MISSL depletion did not affect the expression levels of ER-to-Golgi components**

HeLa cells were transfected with siRNAs for control (NC1), for MISSL (siMI#3 and siMI#4) or for ALG-2 (siALG-2#4) for 48 h. The cell lysates were analyzed by immunoblotting using indicated antibodies.

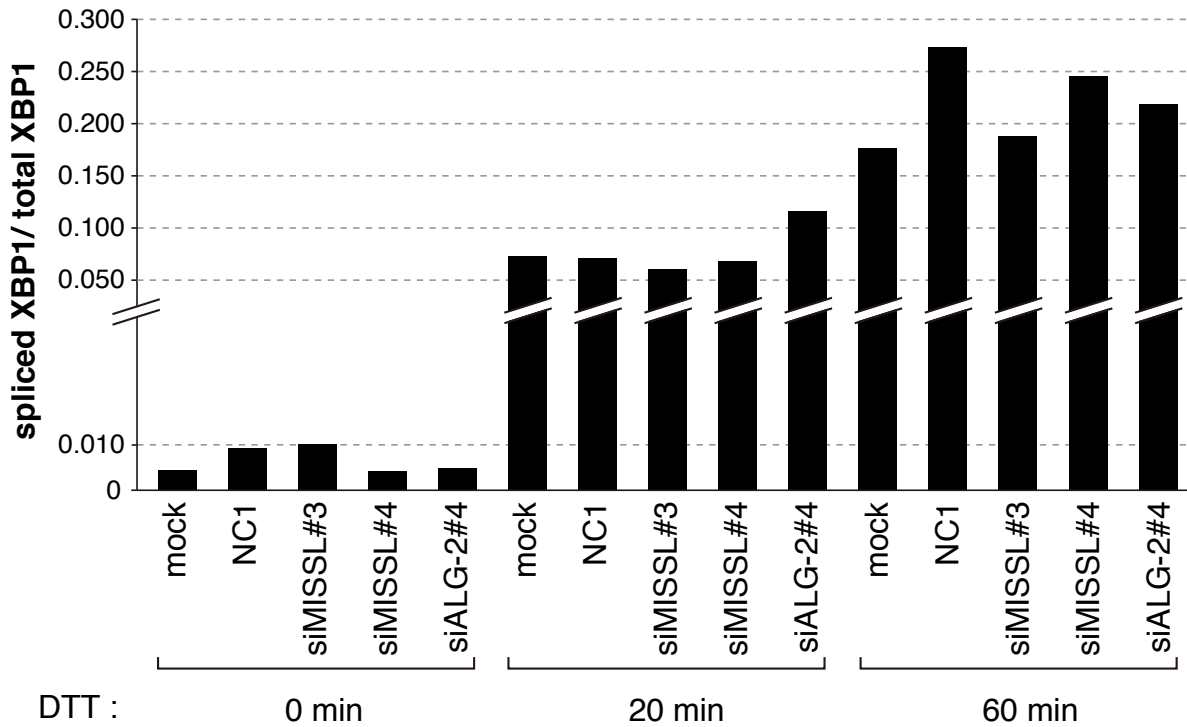

**Figure S3 Depletion of MISSL or ALG-2 did not induce XBP1 splicing**

HeLa cells were transfected with indicated siRNAs. After 48 h, cells were left (0 min), or were treated with 1 mM dithiothreitol (DTT) for 20 min and 60 min, and then were subjected to RNA isolation. RT-qPCR was performed for quantification of spliced XBP1 mRNA and total XBP1 mRNA. The ratio of spliced to total XBP1 were represented.

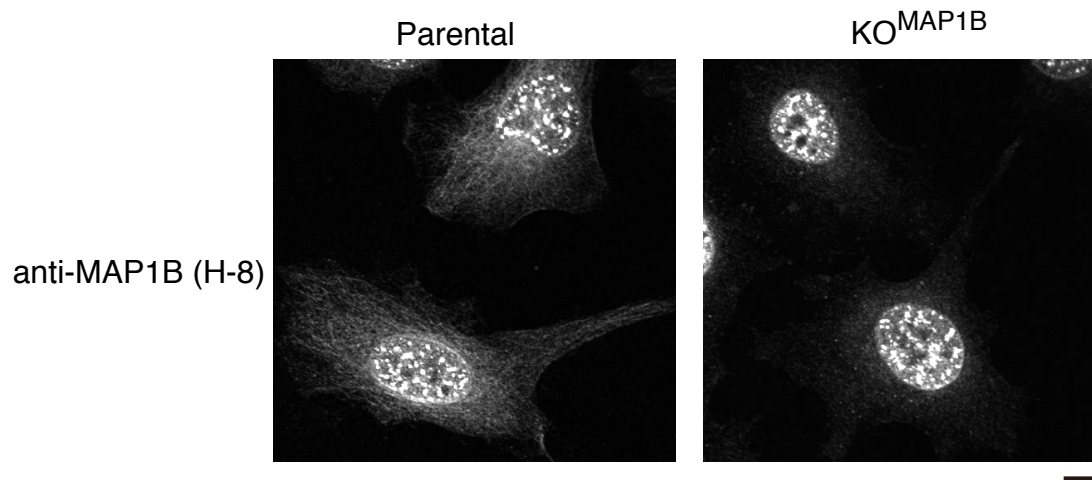

**Figure S4 Validation of the anti-MAP1B (H-8) antibody used for immunostaining.** HeLa cells (parental) and MAP1B KO HeLa cells (KO<sup>MAP1B</sup>) were fixed with methanol at -20° C for 15 min, and immunostained with the anti-MAP1B (H-8) antibody. Note that the cytoplasmic staining of MAP1B was specifically reduced in MAP1B KO cells, and that the nuclear staining with this antibody was nonspecific signals. Bar, 10  $\mu$ m.
